# Supplementary material for: Emergence of SARS-CoV-2 through recombination and strong purifying selection
Source: PubMed Central journal article supplement — Sci Adv. 2020 Jul 1;6(27):eabb9153. doi: 10.1126/sciadv.abb9153 (PMC7458444; doi:10.1126/sciadv.abb9153), 2020-07-01
Supplement: abb9153_SM.pdf [file abb9153_SM.pdf]

## Supplementary Materials for

### **Emergence of SARS-CoV-2 through recombination and strong purifying selection**

Xiaojun Li, Elena E. Giorgi, Manukumar Honnayakanahalli Marichannegowda, Brian Foley, Chuan Xiao, Xiang-Peng Kong,

Yue Chen, S. Gnanakaran, Bette Korber, Feng Gao\*

\*Corresponding author. Email: [fgao@duke.edu](mailto:fgao@duke.edu)

Published 29 May 2020, *Sci. Adv.* **6**, eabb9153 (2020)

DOI: [10.1126/sciadv.abb9153](https://doi.org/10.1126/sciadv.abb9153)

#### **This PDF file includes:**

Figs. S1 to S10

Tables S1 to S3

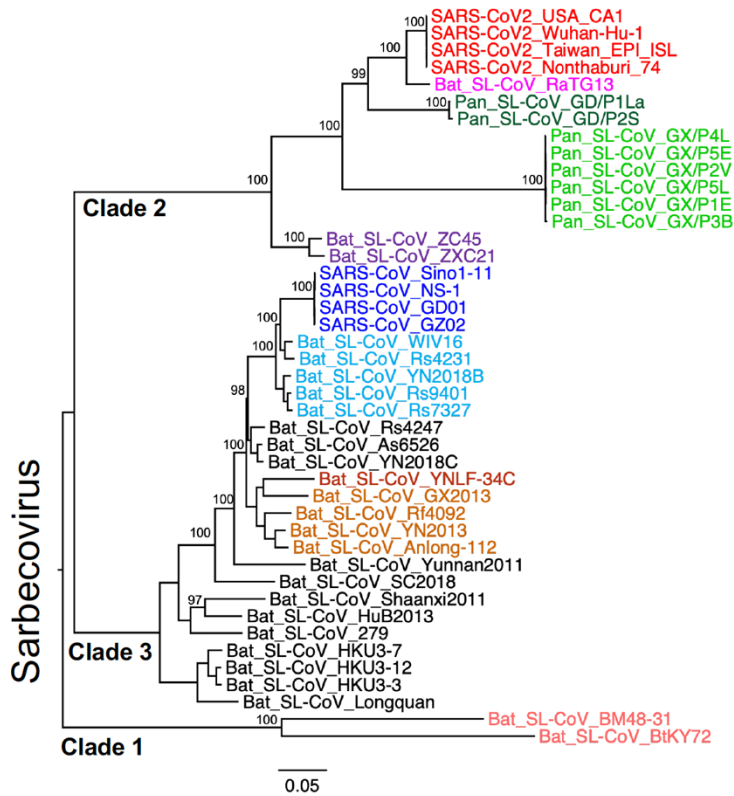

**Fig. S1. Phylogenetic tree of the complete CoV genome sequences.** All 43 sequences used in this study includes: 4 SARS-CoV-2 sequences (red), Bat\_SL-CoV sequence RaTG13 (magenta), 2 pangolin CoV from Guangdong (Pan\_SL-CoV\_GD, dark green), 6 pangolin CoV from Guangxi (Pan\_SL-CoV\_GX, light green), and 4 SARS-CoV sequences (dark blue). The remaining Bat\_SL-CoV sequences in the set are color-coded according to their phylogenetic subclusterings in the tree. Phylogenetic trees were constructed by the maximum likelihood method using the GTR model, and their reliability was estimated from 1,000 bootstrap replicates.

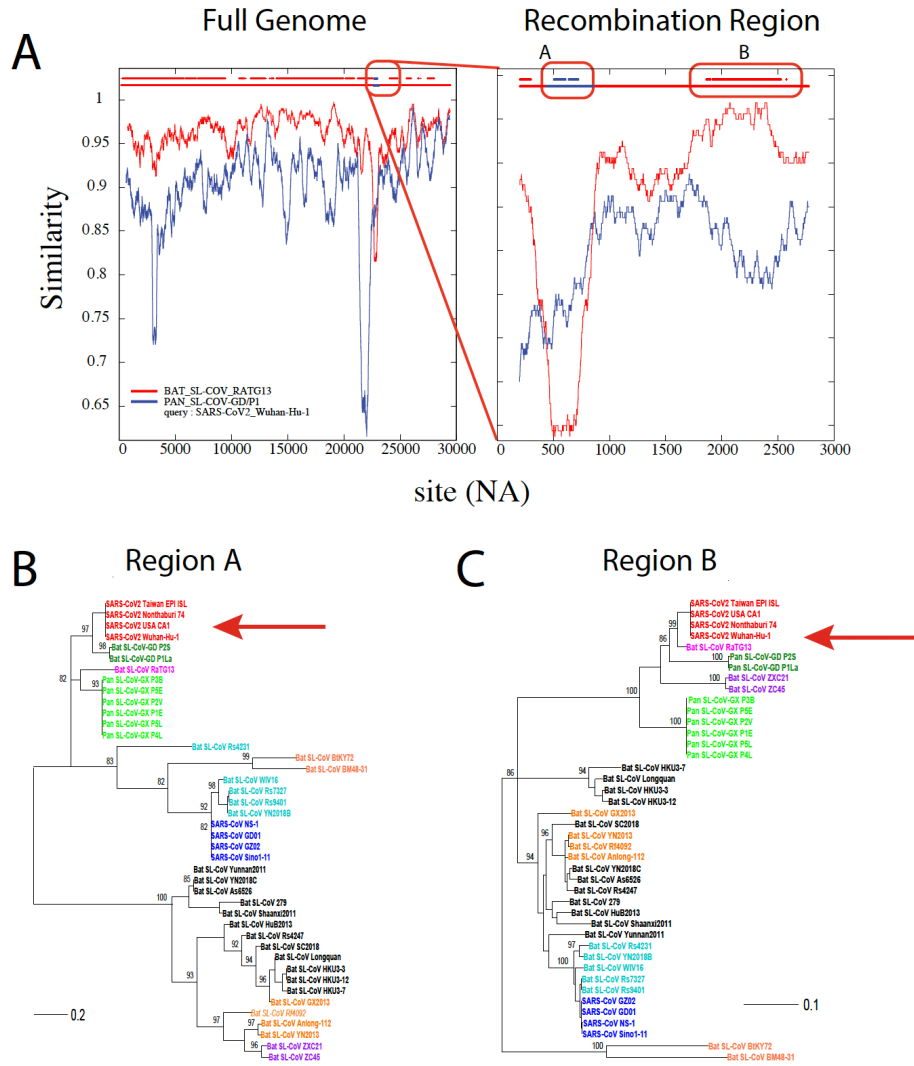

**Fig. S2. Recombination analysis of the CoV-SARS-2 Wuhan-Hu-1 sequence.** (A) Similarity plots comparing the Wuhan-Hu-1 sequence to the bat-Cov RaTG13 sequence (red) and the Pan\_SL-CoV\_GD/1PL sequence (blue). Plots were obtained using the LANL tool RIP using a window size of 400 bp. The full genome comparison is shown on the right and, on the left, a close-up of the recombination region is shown. Blue and red horizontal lines at the top of the panels show recombination breakpoints at the 99% confidence level. The blank between the A and B regions means uncertainty. (B and C) Phylogenetic trees of the individual recombination regions A and B, showing the different clusterings of the CoV-SARS-2 sequence compared to RaTG13 and Pan\_SL-CoV\_GD/1PLa (highlighted by the red arrows).

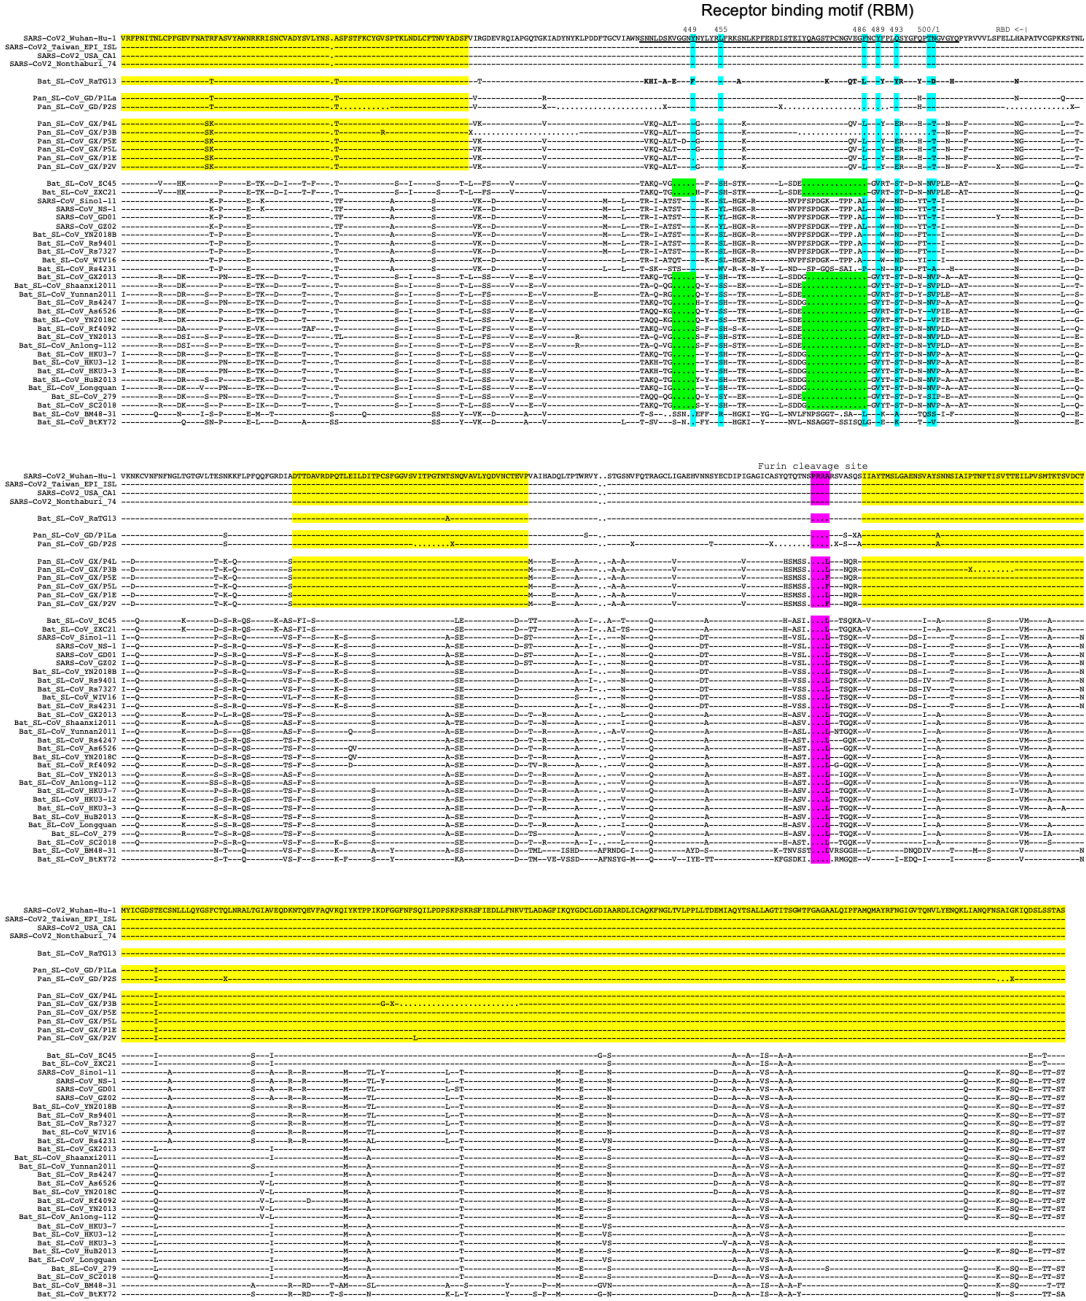

**Fig. S3. Highly conserved sequences around the receptor binding motif and furin cleavage sites among SARS-CoV-2, RaTG13 and Pan\_SL-CoV viruses.** Alignment of amino acid sequences around receptor binding motif (RBM) and furin cleavage sites in the spike glycoprotein compared to Wuhan-Hu-1 (top sequence, na 22541-24391). Identical amino acids are shown as dashes and deletions as dots. RBM is shown at aa positions 439-508, and the furin cleavage site is highlighted in magenta. Regions with identical or nearly identical amino acid sequences among SARS-CoV-2, RaTG13 and Pan\_SL-CoV viruses are highlighted in yellow. The positions of critical contact sites with ACE2 are indicated at the top of the alignment and highlighted in blue. The two large deletions in RBM are indicated in green.

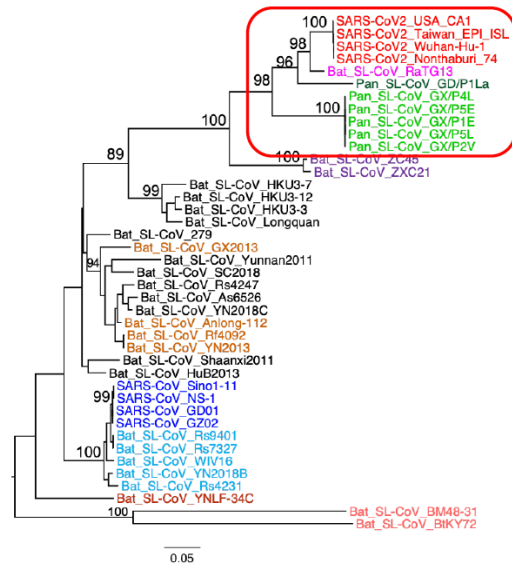

Nucleic acid  
(23924-25384)

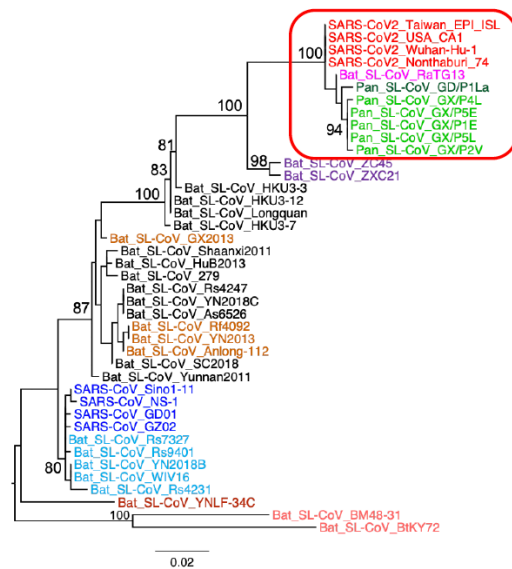

Amino acid

**Fig. S4. Purifying selection in the 3' end region of the S gene.** Purifying selection pressure on the 3' end region (na 23924-25384) of the S gene region among SARS-CoV-2, RaTG13 and Pan\_SL-CoV viruses (within red boxes in phylogenetic trees) are shown by much shorter branches with amino acid sequences than with nucleic acid sequences.

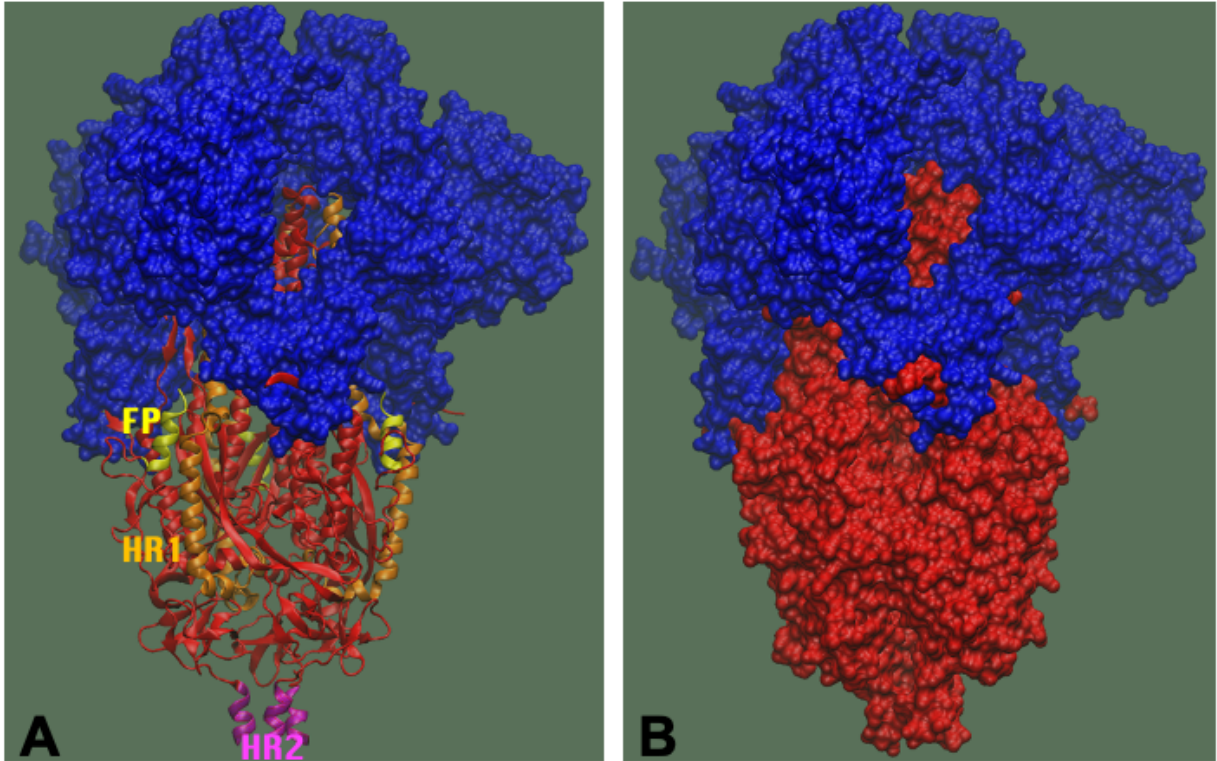

**Fig. S5.** The conformational architecture of Spike trimer in the closed (all RBD down) form (PDB: 6VXX). The S1 and S2 subunits are colored in blue and red, respectively. The separation of S1 and S2 subunits are made at the polybasic furin cleavage site (RRAR). (A) Cartoon like rendering (red) captures the secondary structures of the S2 subunit that take part in fusion. Fusion peptide (yellow) and HR1 (orange) are labeled. The HR2 (magenta) continues at the bottom and not considered in the cryo-EM structure of SARS CoV2. HR2 potentially adopts a symmetric coiled coil trimer similar to SARS CoV1. (B) Surface map indicates that regions of S2 subunit are covered by the S1 subunit.



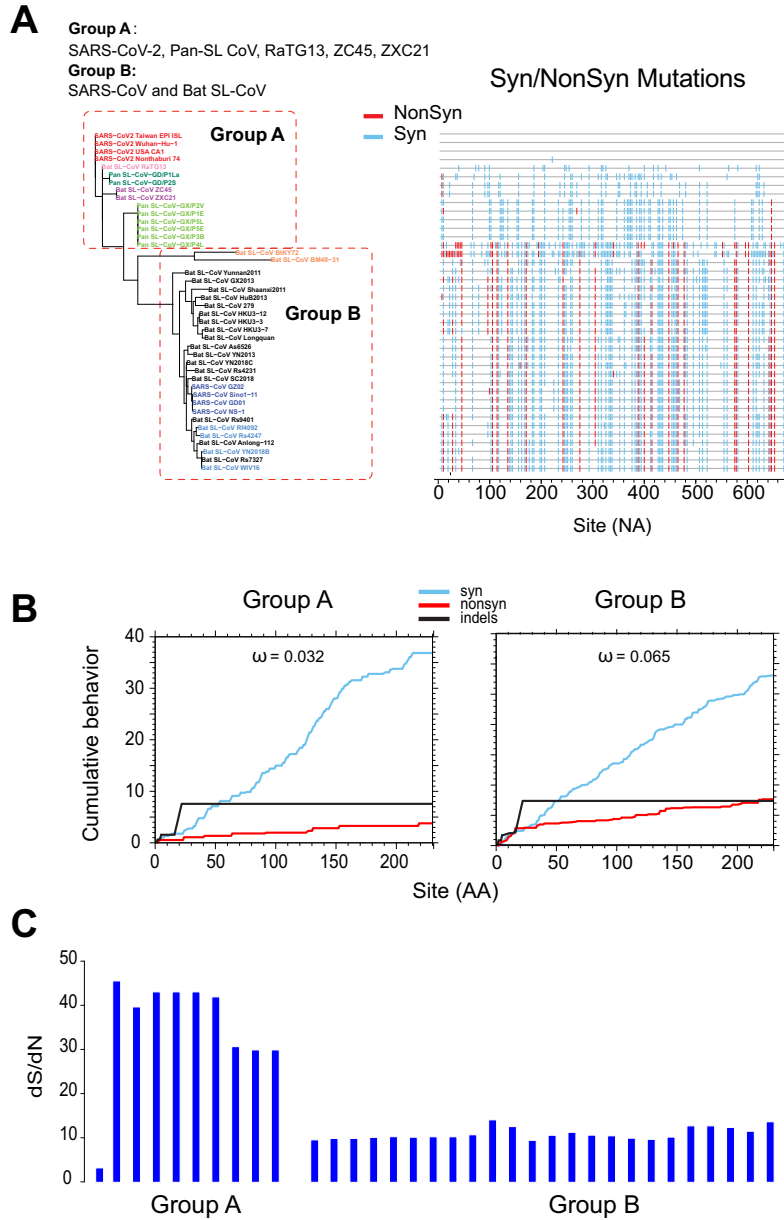

**Fig. S6. Purifying selection pressure on the M gene.** (A) Phylogenetic tree (left) and Highlighter plot (right) of all sequences compared to SARS-CoV-2 in the M gene. SARS-CoV-2, RaTG13, all Pan\_SL-CoV and the two bat CoV (ZXC21 and ZC45) sequences are in Group A, and all other sequences in Group B, to highlight differences between the two groups. Colored tic marks are mutations compared to the top sequence (SARS-CoV-2 Wuahn-Hu-1), with synonymous as light blue and non-synonymous as red. (B) Cumulative plots of the average behavior of each codon for all pairwise comparisons in the input data, for synonymous mutations, non-synonymous mutations and indels of group A sequences (left) and group B sequences (right). Average ratios of the rate of nonsynonymous substitutions per nonsynonymous site (dN/dS, or  $\omega$ ) for each sequence group are reported at the top of each plot. (C) dS/dN ratios of all sequences compared to Wuahn-Hu-1.

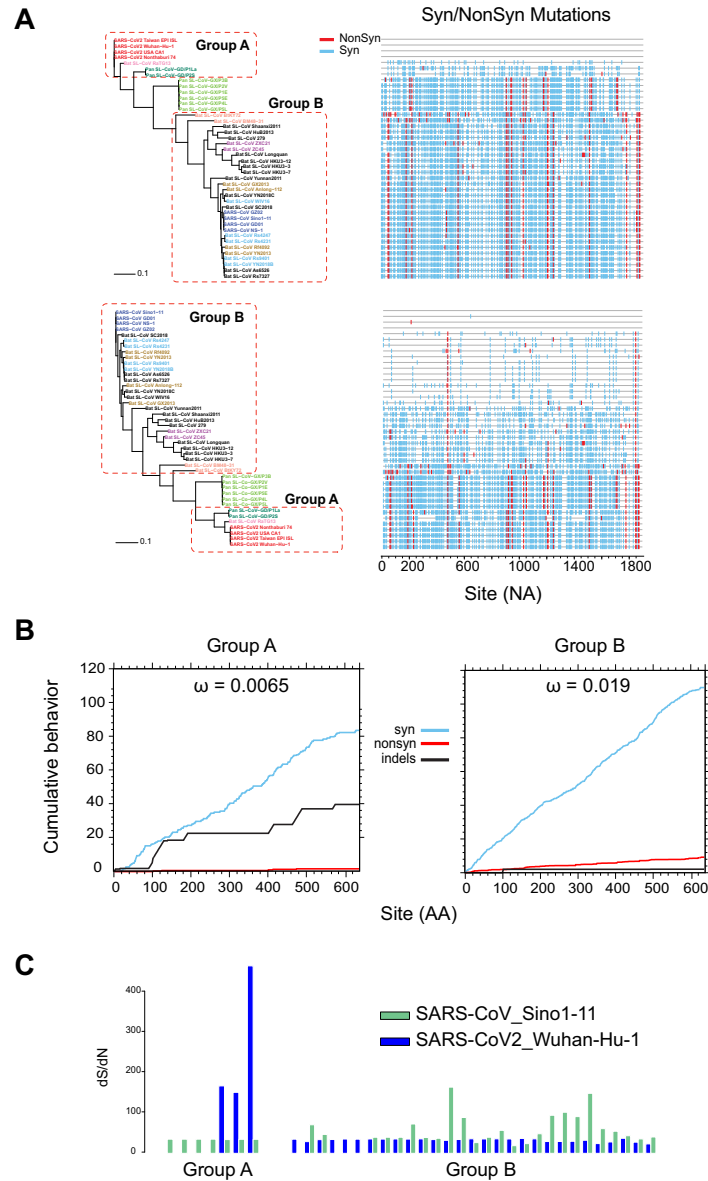

**Fig. S7. Purifying selection pressure on the partial region of ORF1a.** (A) Phylogenetic trees (left) and Highlighter plots (right) of sequences compared to SARS-CoV-2 (top) and to SARS-CoV (bottom) in the partial region of ORF1a. SARS-CoV-2, RaTG13 and Pan\_SL-CoV from Guangdong are in Group A, and all other bat-CoV sequences in Group B, to highlight differences between the two groups. Colored tic marks are mutations compared to the top sequence (SARS-CoV-2 Wuahn-Hu-1 in the top graph and SARS-CoV Sin 1-11 in the bottom graph), with synonymous as light blue and non-synonymous as red. (B) Cumulative plots of the average behavior of each codon for all pairwise comparisons in the input data, for synonymous mutations, non-synonymous mutations and indels of group A sequences (left) and group B sequences (right). Average ratios of the rate of nonsynonymous substitutions per nonsynonymous site (dN/dS, or  $\omega$ ) for each sequence group are reported at the top of each plot. (C) dS/dN ratios of all sequences compared to Wuhan-Hu-1 in dark blue, and compared to SARS-CoV Sin 1-11 in green.



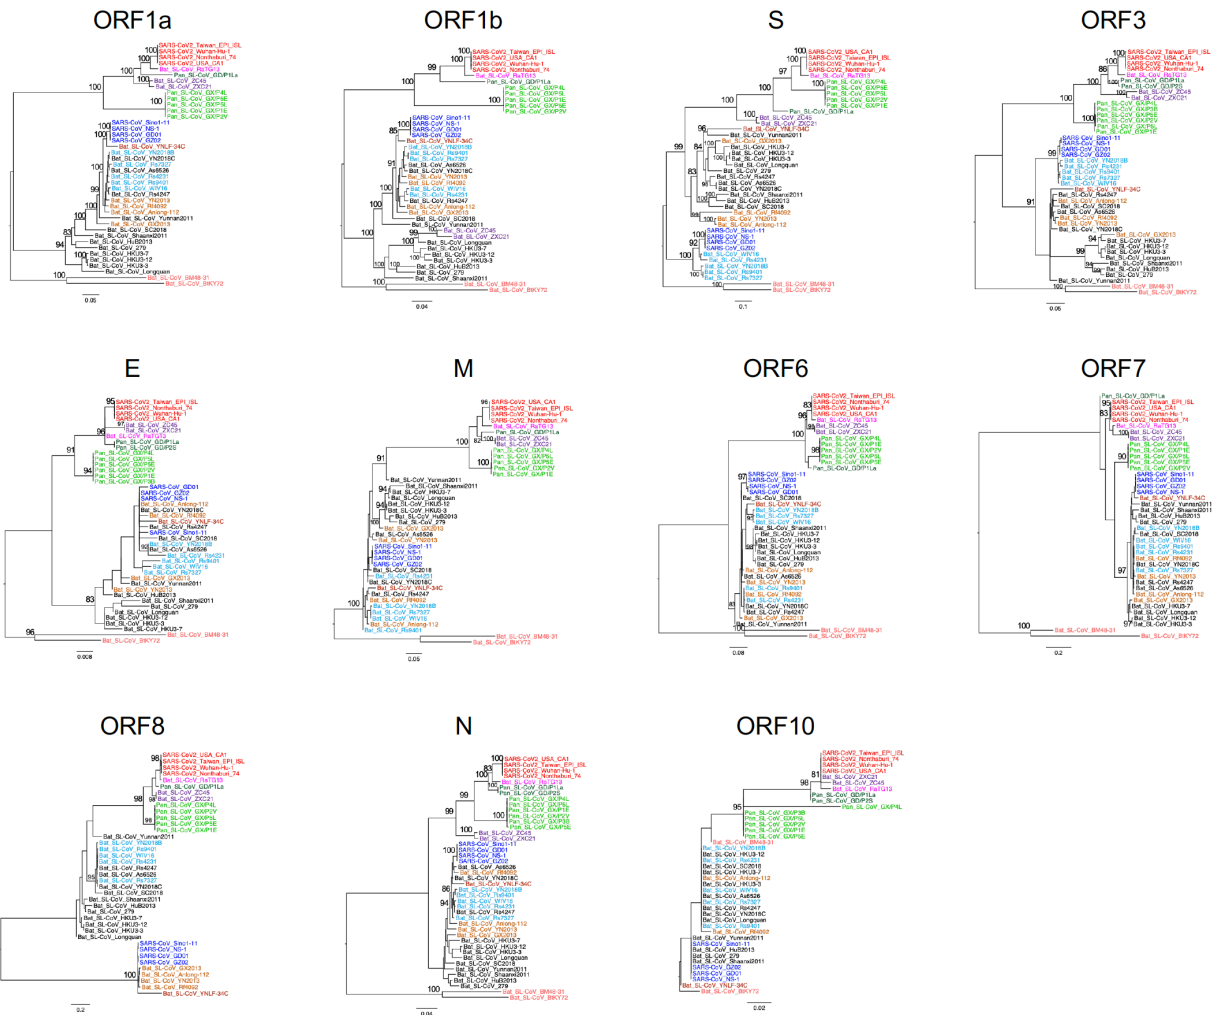

**Fig. S8. Phylogenetic tree analysis of SARS-CoV-2 genes together with other CoVs.**

Phylogenetic trees were constructed for each coding region in the CoV genome. Sequences are colored differently based on their hosts and phylogenetic cluster: 4 SARS-CoV-2 sequences (red), Bat\_SL-CoV sequence RaTG13 (magenta), 2 pangolin CoVs from Guangdong (Pan\_SL-CoV\_GD, dark green), 6 pangolin CoVs from Guangxi (Pan\_SL-CoV\_GX, light green), and 4 SARS-CoV sequences (dark blue). The remaining Bat\_SL-CoV sequences in the set are color-coded according to their phylogenetic subclusterings in the tree.

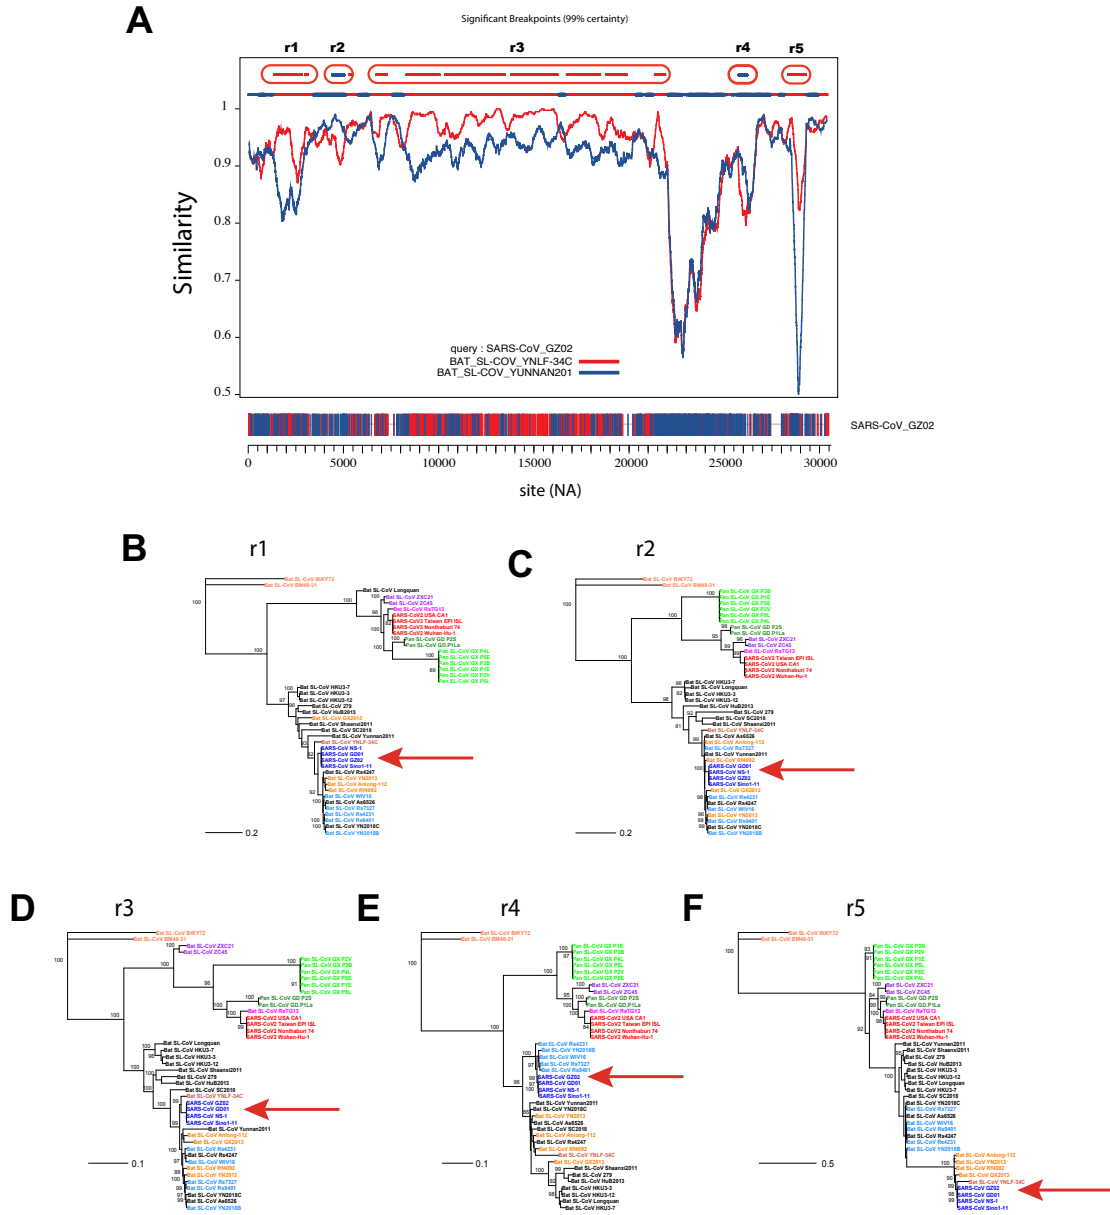

**Fig. S9. Recombination analysis of SARS-CoV sequences.** (A) Similarity plot comparing SARS sequence GZ02 to bat-CoV viruses YNLF-34C (red) and Yunnan2011 (blue). The plot was obtained using the recombination detection tool RIP with a window size of 400 base pairs. Top line shows break points at 99% confidence. Regions between significant break points are highlighted in the red ovals are marked r1-r5. At the bottom of the graph GZ02 is shown with nucleotide mutations colored in red if they are shared with sequence YNLF-34C, blue if they are shared with Yunnan2011. Nucleic acid unique to GZ02 are not shown. (B-F) Phylogenetic trees of the individual regions between break points, showing how the SARS sequences cluster more closely to either YNLF-34C or Yunnan2011 (red arrows). Regions between breakpoints were at the following base positions from the beginning of the genome: 1561-3303 (r1); 4621-5220 (r2); 5521-21360 (r3); 25201-25620 (r4); and 28201-29110 (r5).



**Table S1. Impact of amino acid substitutions in receptor binding motif**

| No. of mutation | Position in SARS-CoV2 RBM | AA in SARS-CoV2 | AA in RaTG13 | $\Delta\Delta G$ (kCal/Mol) | Effect for the RaTG13 mutations       |
|-----------------|---------------------------|-----------------|--------------|-----------------------------|---------------------------------------|
| 1               |                           | Asn             | Lys          |                             | No contact                            |
| 2               |                           | Asn             | His          |                             | No contact                            |
| 3               |                           | Leu             | Ile          |                             | No contact                            |
| 4               |                           | Ser             | Ala          |                             | No contact                            |
| 5               |                           | Val             | Glu          |                             | No contact                            |
| 6               | 449                       | Tyr             | Phe          | 1.62                        | Lost 1 h-bond                         |
| 7               |                           | Ser             | Ala          |                             | No contact                            |
| 8               |                           | Thr             | Lys          |                             | No contact                            |
| 9               |                           | Val             | Gln          |                             | No contact                            |
| 10              |                           | Glu             | Thr          |                             | No contact                            |
| 11              | 486                       | Phe             | Leu          | 1.47                        | Smaller/less hydrophobic              |
| 12              |                           | Phe             | Tyr          |                             | No contact                            |
| 13              | 493                       | Gln             | Tyr          | -0.02                       | more contact with residue H34 of ACE2 |
| 14              |                           | Ser             | Arg          |                             | No contact                            |
| 15              | 498                       | Gln             | Tyr          | 1.78                        | too bulky                             |
| 16              | 501                       | Asn             | Asp          | 0.41                        | Buried a charge                       |
| 17              |                           | His             | Tyr          |                             | No contact                            |

**Table S2. Acknowledgement of sharing of SARS-CoV-2 genome sequences available at GISAID databases**

| Strain name              | Accession ID   | Virus name                          | Location                                       | Collection date | Originating lab                                    | Submitting lab                                                                                                                                                                                                      | Authors                                                                                                                                                                                                                                           |
|--------------------------|----------------|-------------------------------------|------------------------------------------------|-----------------|----------------------------------------------------|---------------------------------------------------------------------------------------------------------------------------------------------------------------------------------------------------------------------|---------------------------------------------------------------------------------------------------------------------------------------------------------------------------------------------------------------------------------------------------|
| SARS-CoV2_Nonthaburi_74  | EPI_ISL_403963 | hCoV-19/Nonthaburi/74/2020          | Asia / Thailand / Nonthaburi                   | 2020-01-13      | Bamrasnaradura Hospital                            | 1. Department of Medical Sciences, Ministry of Public Health, Thailand 2. Thai Red Cross Emerging Infectious Diseases - Health Science Centre 3. Department of Disease Control, Ministry of Public Health, Thailand | Pilailuk, Okada; Siripaporn, Phuygun; Thanutsapa, Thanadachakul; Supaporn, Wacharapluesadee; Sittiporn, Parnmen; Warawan, Wongboot; Sunthareeya, Waicharoen; Rome, Buathong; Malinee, Chittaganpitch; Nanthawan, Mekha                            |
| SARS-CoV2_USA_CA1        | EPI_ISL_406034 | hCoV-19/USACA1/2020                 | North America / USA / California / Los Angeles | 2020-01-23      | California Department of Public Health             | Pathogen Discovery, Respiratory Viruses Branch, Division of Viral Diseases, Centers for Diseases Control and Prevention                                                                                             | Anna Uehara, Krista Queen, Ying Tao, Yan Li, Clinton R. Paden, Jing Zhang, Xiaoyan Lu, Brian Lynch, Senthil Kumar K. Sakthivel, Brett L. Whitaker, Shifaq Kamili, Lijuan Wang, Janna' R. Murray, Susan I. Gerber, Stephen Lindstrom, Suxiang Tong |
| SARS-CoV2_Taiwan_EPI_ISL | EPI_ISL_406031 | hCoV-19/Taiwan/2/2020               | Asia / Taiwan / Kaohsiung                      | 2020-01-23      | Centers for Disease Control, R.O.C. (Taiwan)       | Centers for Disease Control, R.O.C. (Taiwan)                                                                                                                                                                        | Ji-Rong Yang, Yu-Chi Lin, Jung-Jung Mu, Ming-Tsan Liu, Shu-Ying Li                                                                                                                                                                                |
| Pan_SL-CoV_GX/P1E        | EPI_ISL_410539 | hCoV-19/pangolin/Guangxi/P1E/2017   | Asia / China / Guangxi                         | 2017            | Beijing Institute of Microbiology and Epidemiology | Beijing Institute of Microbiology and Epidemiology                                                                                                                                                                  | Wu-Chun Cao; Tommy Tsan-Yuk Lam; Na Jia; Ya-Wei Zhang; Jia-Fu Jiang; Bao-Gui Jiang                                                                                                                                                                |
| Pan_SL-CoV_GX/P5E        | EPI_ISL_410541 | hCoV-19/pangolin/Guangxi/P5E/2017   | Asia / China / Guangxi                         | 2017            | Beijing Institute of Microbiology and Epidemiology | Beijing Institute of Microbiology and Epidemiology                                                                                                                                                                  | Wu-Chun Cao; Tommy Tsan-Yuk Lam; Na Jia; Ya-Wei Zhang; Jia-Fu Jiang; Bao-Gui Jiang                                                                                                                                                                |
| Pan_SL-CoV_GX/P5L        | EPI_ISL_410540 | hCoV-19/pangolin/Guangxi/P5L/2017   | Asia / China / Guangxi                         | 2017            | Beijing Institute of Microbiology and Epidemiology | Beijing Institute of Microbiology and Epidemiology                                                                                                                                                                  | Wu-Chun Cao; Tommy Tsan-Yuk Lam; Na Jia; Ya-Wei Zhang; Jia-Fu Jiang; Bao-Gui Jiang                                                                                                                                                                |
| Pan_SL-CoV_GX/P4L        | EPI_ISL_410538 | hCoV-19/pangolin/Guangxi/P4L/2017   | Asia / China / Guangxi                         | 2017            | Beijing Institute of Microbiology and Epidemiology | Beijing Institute of Microbiology and Epidemiology                                                                                                                                                                  | Wu-Chun Cao; Tommy Tsan-Yuk Lam; Na Jia; Ya-Wei Zhang; Jia-Fu Jiang; Bao-Gui Jiang                                                                                                                                                                |
| Pan_SL-CoV_GX/P3B        | EPI_ISL_410543 | hCoV-19/pangolin/Guangxi/P3B/2017   | Asia / China / Guangxi                         | 2017            | Beijing Institute of Microbiology and Epidemiology | Beijing Institute of Microbiology and Epidemiology                                                                                                                                                                  | Wu-Chun Cao; Tommy Tsan-Yuk Lam; Na Jia; Ya-Wei Zhang; Jia-Fu Jiang; Bao-Gui Jiang                                                                                                                                                                |
| Pan_SL-CoV_GX/P2V        | EPI_ISL_410542 | hCoV-19/pangolin/Guangxi/P2V/2017   | Asia / China / Guangxi                         | 2017            | Beijing Institute of Microbiology and Epidemiology | Beijing Institute of Microbiology and Epidemiology                                                                                                                                                                  | Wu-Chun Cao; Tommy Tsan-Yuk Lam; Na Jia; Ya-Wei Zhang; Jia-Fu Jiang; Bao-Gui Jiang                                                                                                                                                                |
| Pan_SL-CoV_GD/P2S        | EPI_ISL_410544 | hCoV-19/pangolin/Guangdong/P2S/2019 | Asia / China / Guangdong                       | 2019            | Beijing Institute of Microbiology and Epidemiology | Beijing Institute of Microbiology and Epidemiology                                                                                                                                                                  | Wu-Chun Cao; Tommy Tsan-Yuk Lam; Na Jia; Ya-Wei Zhang; Jia-Fu Jiang; Bao-Gui Jiang                                                                                                                                                                |
| Pan_SL-CoV_GD/P1L        | EPI_ISL_412860 | hCoV-19/pangolin/China/MP789/2019   | Asia / China                                   | 2019-03-19      | unknown                                            | SCSFRI, South China Sea Fisheries Research Institute, Chinese Academy of Fishery Sciences (SCSFRI, CAFS)                                                                                                            | Jiang, J.-Z., Liu, P. and Chen, J.-P.                                                                                                                                                                                                             |

**Table S3. GenBank accession numbers of coronavirus sequences used in this study**

| Strain name            | Accession ID | Host                      | Publication                                                                                                                                                          |
|------------------------|--------------|---------------------------|----------------------------------------------------------------------------------------------------------------------------------------------------------------------|
| SARS-CoV2_Wuhan-Hu-1   | MN908947.3   | Human                     | Wu <i>et al.</i> Nature 579 (7798), 265-269 (2020)                                                                                                                   |
| Bat_SL-CoV_RaTG13      | MN996532.1   | Rhinolophus affinis       | Zhou <i>et al.</i> Nature 579 (7798), 270-273 (2020)                                                                                                                 |
| Bat_SL-CoV_ZC45        | MG772933.1   | Rhinolophus sinicus       | Hu <i>et al.</i> Emerg Microbes Infect 7 (1), 154 (2018)                                                                                                             |
| Bat_SL-CoV_ZXC21       | MG772934.1   | Rhinolophus sinicus       | Hu <i>et al.</i> Emerg Microbes Infect 7 (1), 154 (2018)                                                                                                             |
| SARS-CoV_Sino1-11      | AY485277.1   | Human                     | Zhang <i>et al.</i> Vaccine 23 (48-49), 5666-5669 (2005)                                                                                                             |
| SARS-CoV_NS-1          | AY508724.1   | Human                     | <i>Journal information is not available in the GenBank record</i>                                                                                                    |
| SARS-CoV_GD01          | AY278489.2   | Human                     | Wu <i>et al.</i> Genomics Proteomics Bioinformatics 1 (2), 131-144 (2003)                                                                                            |
| SARS-CoV_GZ02          | AY390556.1   | Human                     | <i>Journal information is not available in the GenBank record</i>                                                                                                    |
| Bat_SL-CoV_YNLF-34C    | KP886809.1   | Rhinolophus Ferrumequinum | <i>Journal information is not available in the GenBank record</i>                                                                                                    |
| Bat_SL-CoV_YN2018B     | MK211376.1   | Rhinolophus affinis       | Han <i>et al.</i> Front Microbiol, 10: 1900 (2019)                                                                                                                   |
| Bat_SL-CoV_Rs9401      | KY417152.1   | Rhinolophus sinicus       | PLoS Pathog. 13 (11), e1006698 (2017)                                                                                                                                |
| Bat_SL-CoV_Rs7327      | KY417151.1   | Rhinolophus sinicus       | Hu <i>et al.</i> PLoS Pathog. 13 (11), e1006698 (2017)                                                                                                               |
| Bat_SL-CoV_WIV16       | KT444582.1   | Rhinolophus sinicus       | Yang <i>et al.</i> J. Virol. 90 (6), 3253-3256 (2016)                                                                                                                |
| Bat_SL-CoV_Rs4231      | KY417146.1   | Rhinolophus sinicus       | Hu <i>et al.</i> PLoS Pathog. 13 (11), e1006698 (2017)                                                                                                               |
| Bat_SL-CoV_GX2013      | KJ473815.1   | Rhinolophus sinicus       | Wu <i>et al.</i> J. Infect. Dis. 213 (4), 579-583 (2016)<br>Wu <i>et al.</i> ISME J 10 (3), 609-620 (2016)                                                           |
| Bat_SL-CoV_Shaanxi2011 | JX993987.1   | Rhinolophus pusillus      | Yang <i>et al.</i> Emerging Infect. Dis. 19 (6) (2013)<br>Wu <i>et al.</i> J. Infect. Dis. 213 (4), 579-583 (2016)<br>Wu <i>et al.</i> ISME J 10 (3), 609-620 (2016) |
| Bat_SL-CoV_Yunnan2011  | JX993988.1   | Chaerephon plicata        | Yang <i>et al.</i> Emerging Infect. Dis. 19 (6) (2013)<br>Wu <i>et al.</i> J. Infect. Dis. 213 (4), 579-583 (2016)<br>Wu <i>et al.</i> ISME J 10 (3), 609-620 (2016) |
| Bat_SL-CoV_Rs4247      | KY417148.1   | Rhinolophus sinicus       | Hu <i>et al.</i> PLoS Pathog. 13 (11), e1006698 (2017)                                                                                                               |
| Bat_SL-CoV_As6526      | KY417142.1   | Aselliscus stoliczkanus   | Hu <i>et al.</i> PLoS Pathog. 13 (11), e1006698 (2017)                                                                                                               |
| Bat_SL-CoV_YN2018C     | MK211377.1   | Rhinolophus affinis       | Han <i>et al.</i> Front Microbiol, 10: 1900 (2019)                                                                                                                   |
| Bat_SL-CoV_RF4092      | KY417145.1   | Rhinilophus ferrumequinum | Hu <i>et al.</i> PLoS Pathog. 13 (11), e1006698 (2017)                                                                                                               |
| Bat_SL-CoV_YN2013      | KJ473816.1   | Rhinolophus sinicus       | Wu <i>et al.</i> J. Infect. Dis. 213 (4), 579-583 (2016)<br>Wu <i>et al.</i> ISME J 10 (3), 609-620 (2016)                                                           |
| Bat_SL-CoV_Anlong-112  | KY770859.1   | Rhinolophus sinicus       | Lin <i>et al.</i> Virology 507, 1-10 (2017)                                                                                                                          |
| Bat_SL-CoV_HKU3-7      | GQ153542.1   | Rhinolophus sinicus       | Lau <i>et al.</i> J. Virol. 84 (6), 2808-2819 (2010)                                                                                                                 |
| Bat_SL-CoV_HKU3-12     | GQ153547.1   | Rhinolophus sinicus       | Lau <i>et al.</i> J. Virol. 84 (6), 2808-2819 (2010)                                                                                                                 |
| Bat_SL-CoV_HKU3-3      | DQ084200.1   | Rhinolophus sinicus       | Lau <i>et al.</i> Proc. Natl. Acad. Sci. U.S.A. 102 (39), 14040-14045 (2005)                                                                                         |
| Bat_SL-CoV_HuB2013     | KJ473814.1   | Rhinolophus sinicus       | Wu <i>et al.</i> J. Infect. Dis. 213 (4), 579-583 (2016)<br>Wu <i>et al.</i> ISME J 10 (3), 609-620 (2016)                                                           |
| Bat_SL-CoV_Longquan    | KF294457.1   | Rhinolophus monoceros     | Lin <i>et al.</i> Virology 507, 1-10 (2017)                                                                                                                          |
| Bat_SL-CoV_279         | DQ648857.1   | Rhinolophus Macrotis      | Tang <i>et al.</i> J. Virol. 80 (15), 7481-7490 (2006)                                                                                                               |
| Bat_SL-CoV_SC2018      | MK211374.1   | Rhinolophus sp.           | Han <i>et al.</i> Front Microbiol, 10: 1900 (2019)                                                                                                                   |
| Bat_SL-CoV_BM48-31     | GU190215.1   | Rhinolophus blasii        | Drexler <i>et al.</i> J. Virol. 84 (21), 11336-11349 (2010)                                                                                                          |
| Bat_SL-CoV_BtkY72      | KY352407.1   | Rhinolophus sp.           | Tao <i>et al.</i> Microbiol Resour Announc 8 (28), e00548-19 (2019)                                                                                                  |
